# Supplementary material
Source: publisher figshare collection journal article supplement (https://karger.figshare.com/ndownloader/files/15236036)

**Lactose intolerance is one of the most common forms of food intolerance and is often confused with cow's milk allergy**

Lactose intolerance results from a reduced ability to digest lactose, the main digestible carbohydrate in mammalian milk. The fermentation of undigested lactose can lead to gastrointestinal symptoms similar to the symptoms of cow's milk allergy.

| Cow's milk allergy                                                                                                                        |                                                | Lactose intolerance<br>(primary or adult type)                                        |                                                       |
|-------------------------------------------------------------------------------------------------------------------------------------------|------------------------------------------------|---------------------------------------------------------------------------------------|-------------------------------------------------------|
|                                                          | <b>Cow's milk allergy</b>                      |    | <b>Lactose intolerance</b><br>(primary or adult type) |
|                                                          | Immune-mediated reaction                       |     | Enzyme deficiency                                     |
|                                                          | Peaks during the first year of life            |    | Onset of symptoms: 5–6 years of age                   |
|                                                          | Tends to remit in childhood (2–5 years of age) |     | Irreversible                                          |
|                                                          | Cow's milk proteins                            |     | Lactose                                               |
| Angioedema of the lips, tongue, and palate; oral pruritus, nausea, abdominal pain, vomiting, diarrhea, blood and/or mucus in stool        |                                                | Abdominal pain, nausea, bloating, flatulence, diarrhea                                |                                                       |
| Skin (urticaria, angioedema); respiratory system (from nasal itching to shortness of breath); other (signs of anaphylaxis); atopic eczema |                                                | Headache, vertigo, memory impairment, lethargy                                        |                                                       |
|                                                        | Oral food challenge                            |  | Lactose breath test                                   |
| Diet free of cow's milk protein                                                                                                           |                                                | Low-lactose diet                                                                      |                                                       |

## When to restrict lactose

|                                                                                                                                                                  |                                                                                                                                              |                                                                                                                                                                |                                                                                                                                                                                     |
|------------------------------------------------------------------------------------------------------------------------------------------------------------------|----------------------------------------------------------------------------------------------------------------------------------------------|----------------------------------------------------------------------------------------------------------------------------------------------------------------|-------------------------------------------------------------------------------------------------------------------------------------------------------------------------------------|
| <b>Congenital lactase deficiency</b><br><i>Complete exclusion of lactose</i>  | <b>Primary lactose intolerance</b><br><i>Low lactose</i>  | <b>Secondary lactose intolerance</b><br><i>Low lactose (temporarily)</i>  | <b>Cow's milk allergy</b><br><i>No restriction (except in the case of severe enteropathy)</i>  |
|------------------------------------------------------------------------------------------------------------------------------------------------------------------|----------------------------------------------------------------------------------------------------------------------------------------------|----------------------------------------------------------------------------------------------------------------------------------------------------------------|-------------------------------------------------------------------------------------------------------------------------------------------------------------------------------------|

**Unnecessary elimination of lactose from the infant's diet is disadvantageous for the development of a healthy gut microbiome.**

**A better knowledge of the differences between lactose intolerance and cow's milk allergy can help limit misunderstandings in diagnosing and managing these conditions.**

### Lactose intolerance

Annals of  
**Nutrition & Metabolism**

Annals of Nutrition & Metabolism  
Vol. 73, Suppl. 4, 30–37, 2018

**NNI** Nestlé  
Nutrition  
Institute

Annales Nestlé  
Vol. 76, No. 3, 2018

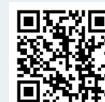

Supplement: Supplementary file 1 [file 15236036]
